# Supplementary material for: Solution-Processable Colorless Polyimides Derived from Hydrogenated Pyromellitic Dianhydride: Strategies to Reduce the Coefficients of Thermal Expansion by Maximizing the Spontaneous Chain Orientation Behavior during Solution Casting
Source: MDPI journal article supplement (doi:10.3390/polym14061131), 2022-03-11
Supplement: s1 [file s1]

## Supporting Information

### S1. Synthetic procedures for a monoamide-type diamine (PDA-*t*CHDCA).

In a sealed flask, *trans*-1,4-cyclohexanedicarbonyl chloride (*t*-CHDCC, 10 mmol) was dissolved in anhydrous tetrahydrofuran (THF, 5.4 mL). In another sealed flask, 4-nitroaniline (4-NA, 23 mmol) was dissolved in THF (8.2 mL) in the presence of pyridine (30 mmol, 2.4 mL) as an HCl acceptor. To the *t*-CHDCC solution cooled at 0 °C, the 4-NA solution was gradually added using a syringe with continuous magnetic stirring, after which the reaction mixture was stirred at 0 °C for several hours, subsequently at room temperature for 12 h. The pale-yellowish precipitate formed was collected by filtration, washed with THF, a large quantity of water, and methanol, and dried at 120 °C under vacuum for 12 h (yield: 93%). The crude product was recrystallized from *N,N*-dimethylformamide (DMF), washed with ethanol, and dried at 100 °C for 12 h under vacuum (recrystallization yield: 81%). The product was confirmed to be the desired dinitro compound by the following data. FT-IR (KBr plate method, cm<sup>-1</sup>): 3320/3287/3221 (amide N-H), 3090 (C<sub>arom</sub>-H), 2945/2867 (C<sub>aliph</sub>-H), 1677 (amide-I, C=O), 1555 (NO<sub>2</sub> + amide-II, C=O), 1498 (1,4-phenylene), 1337 (NO<sub>2</sub>). <sup>1</sup>H-NMR [400 MHz, dimethyl sulfoxide (DMSO)-*d*<sub>6</sub>, δ, ppm]: 10.53 [s, 2H (relative integrated intensity: 2.00H), NHCO], 8.22 [d, 4H (4.04H), *J* = 8.6 Hz, 2,2',6,6'-protons of the terminal nitrobenzene units (NB)], 7.86 [d, 4H (4.03H), *J* = 8.7 Hz, 3,3',5,5'-protons of NB], 2.43 [t (unresolved), 2H (2.02H), 1,4-protons of the central cyclohexane unit (CH<sub>x</sub>)], 1.98 [q, 4H (3.99H), *J* = 7.4 Hz, 2,3,5,6-axial protons of CH<sub>x</sub>], 1.53–1.48 [m, 4H (4.04H), 2,3,5,6-equatorial protons of CH<sub>x</sub>].

The catalytic reduction of this dinitro compound was conducted while tracking the reaction with thin-layer chromatography as follows. The nitro compound (3.09 g) was dissolved in DMF (300 mL) in the presence of Pd/C (0.38 g) as a catalyst. The reaction mixture was refluxed at 80 °C for 5 h in a hydrogen atmosphere, and the catalyst residue was removed by hot filtration. The filtrate was concentrated with an evaporator and slowly poured into a large quantity of water. The white precipitate formed was washed with methanol, and dried at 120 °C for 12 h under vacuum (yield: 52%). The product was confirmed to be the desired diamine (PDA-*t*CHDCA) by the following data. Melting point (DSC): 385 °C. FT-IR (KBr plate method, cm<sup>-1</sup>): 3376/3294/3222/3172 (amine + amide N-H), 3034 (C<sub>arom</sub>-H), 2952/2915/2853 (C<sub>aliph</sub>-H), 1670/1536 (amide C=O), 1509 (1,4-phenylene). <sup>1</sup>H-NMR (400 MHz, DMSO-*d*<sub>6</sub>, δ, ppm): 9.41 [s, 2H (2.00H), NHCO], 7.22 [d, 2H (4.00H), *J* = 8.8 Hz, 3,3',5,5'-protons of the terminal aniline unit (AN)], 6.47 [d, 4H (4.01H), *J* = 8.8 Hz, 2,2',6,6'-protons of AN], 4.81 [s, 4H (4.07H), NH<sub>2</sub>], 2.25 [t (unresolved), 2H (2.02H), 1,4-protons of CH<sub>x</sub>], 1.85 [q, 4H (4.05H), *J* = 7.0 Hz, 2,3,5,6-axial protons of CH<sub>x</sub>], 1.47–1.42 [m, 4H (3.94H), 2,3,5,6-equatorial protons of CH<sub>x</sub>]. Elemental analysis, Anal. Calcd (%) for C<sub>20</sub>H<sub>24</sub>O<sub>2</sub>N<sub>4</sub> (352.44): C, 68.16; H, 6.86; N, 15.90. Found: C, 67.99; H, 6.65; N, 16.03.

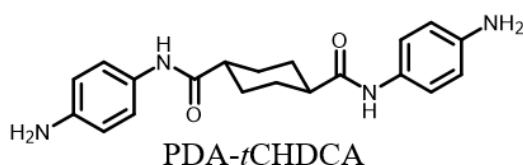

**Table S1.** Abbreviations, commercial sources, and melting points of the common monomers used in this study.

| Common diamines                                                                                                                                                                                      | Source                        | Vacuum-drying condition | Melting point <sup>a</sup> (°C) |
|------------------------------------------------------------------------------------------------------------------------------------------------------------------------------------------------------|-------------------------------|-------------------------|---------------------------------|
| 4,4'-Oxydianiline (4,4'-ODA)                                                                                                                                                                         | Wako Chemical                 | 50 °C/24 h              | 191 <sup>a</sup>                |
| 3,4'-Oxydianiline (3,4'-ODA)                                                                                                                                                                         | Wakayama Seika                | 50 °C/12 h              | 79 <sup>a</sup>                 |
| <i>p</i> -Phenylenediamine ( <i>p</i> -PDA)                                                                                                                                                          | Wako Chemical                 | 30 °C/24 h              | 141 <sup>a</sup>                |
| <i>m</i> -Tolidine ( <i>m</i> -TOL)                                                                                                                                                                  | Wako Chemical                 | 50 °C/24 h              | 106 <sup>b</sup>                |
| 4,4'-Diaminobenzanilide (DABA)                                                                                                                                                                       | Tokyo Chemical Industry (TCI) | 50 °C/12 h              | 205 <sup>a</sup>                |
| 4-Aminophenyl-4'-aminobenzoate (APAB)                                                                                                                                                                | Wakayama Seika                | 50 °C/12 h              | 185 <sup>a</sup>                |
| 4-Amino-2-methylphenyl-4'-aminobenzoate (ATAB)                                                                                                                                                       | Wakayama Seika                | 50 °C/12 h              | 162 <sup>a</sup>                |
| 2,2'-Bis(trifluoromethyl)benzidine (TFMB)                                                                                                                                                            | Wakayama Seika                | 50 °C/12 h              | 184 <sup>a</sup>                |
| 2,2-Bis[4-(4-aminophenoxy)phenyl]propane (BAPP)                                                                                                                                                      | Wakayama Seika                | 50 °C/12 h              | 130 <sup>a</sup>                |
| 1- <i>exo</i> ,2- <i>exo</i> ,4- <i>exo</i> ,5- <i>exo</i> -Cyclohexanetetracarboxylic dianhydride (1 <i>S</i> ,2 <i>R</i> ,4 <i>S</i> ,5 <i>R</i> -Cyclohexanetetracarboxylic dianhydride) (H-PMDA) | Mitsubishi Gas Chemical       | 160 °C/12 h             | 303 <sup>a</sup>                |

<sup>a</sup> Data determined from the endothermic peak measured at a heating rate of 5 °C min<sup>-1</sup> on DSC.<sup>b</sup> Data from the safety data sheet**Table S2.** Abbreviations, commercial sources, and melting points of the raw materials used in this study.

| Raw materials                                                                         | Source                        | Melting point (°C) |
|---------------------------------------------------------------------------------------|-------------------------------|--------------------|
| 4-Nitrobenzoyl chloride (4-NBC)                                                       | TCI                           | 73 <sup>b</sup>    |
| 2-Methoxy-4-nitroaniline                                                              | TCI                           | 140 <sup>b</sup>   |
| 2-Methyl-4-nitroaniline                                                               | TCI                           | 132 <sup>b</sup>   |
| 4-Nitroaniline                                                                        | TCI                           | 148 <sup>b</sup>   |
| 3-Methyl-4-nitrobenzoic acid                                                          | TCI                           | 217 <sup>b</sup>   |
| <i>trans</i> -1,4-Cyclohexanedicarbonyl chloride ( <i>t</i> -CHDCC)                   | Iharanikkei Chemical Industry |                    |
| 1- <i>exo</i> ,2- <i>exo</i> ,4- <i>exo</i> -Cyclohexanetricarboxylic anhydride (HTA) | Mitsubishi Gas Chemical       | 156 <sup>a</sup>   |
| 4-Aminobenzoic acid                                                                   | TCI                           | 189 <sup>b</sup>   |

<sup>a</sup> Data determined from the endothermic peak measured at a heating rate of 5 °C min<sup>-1</sup> on DSC.<sup>b</sup> Data from the safety data sheet

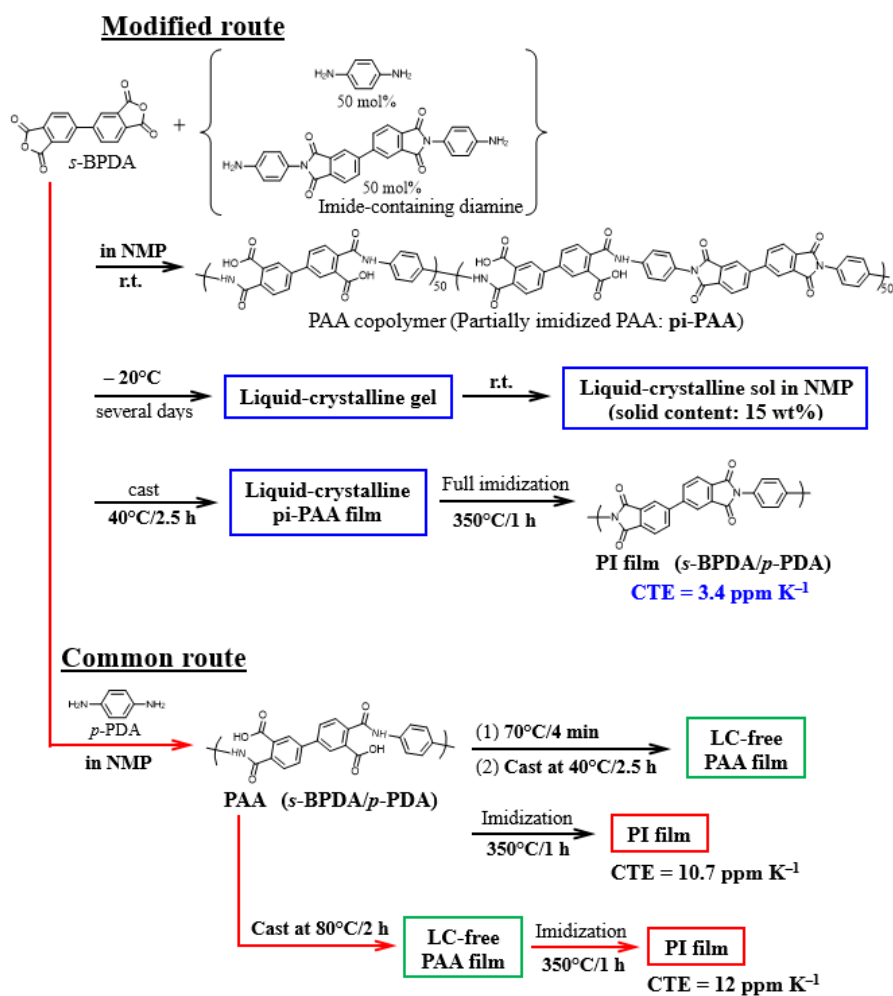

**Figure S1.** Different film preparation routes via full thermal imidization of the partially imidized  $s\text{-BPDA}/p\text{-PDA}$  cast film with liquid-crystalline (LC) domains and the pristine PAA cast film without LC domains.
